# Supplementary material for: Whole-genome amplification in double-digest RADseq results in adequate libraries but fewer sequenced loci
Source: PeerJ journal article supplement (doi:10.7717/peerj.5089), 2018-07-17

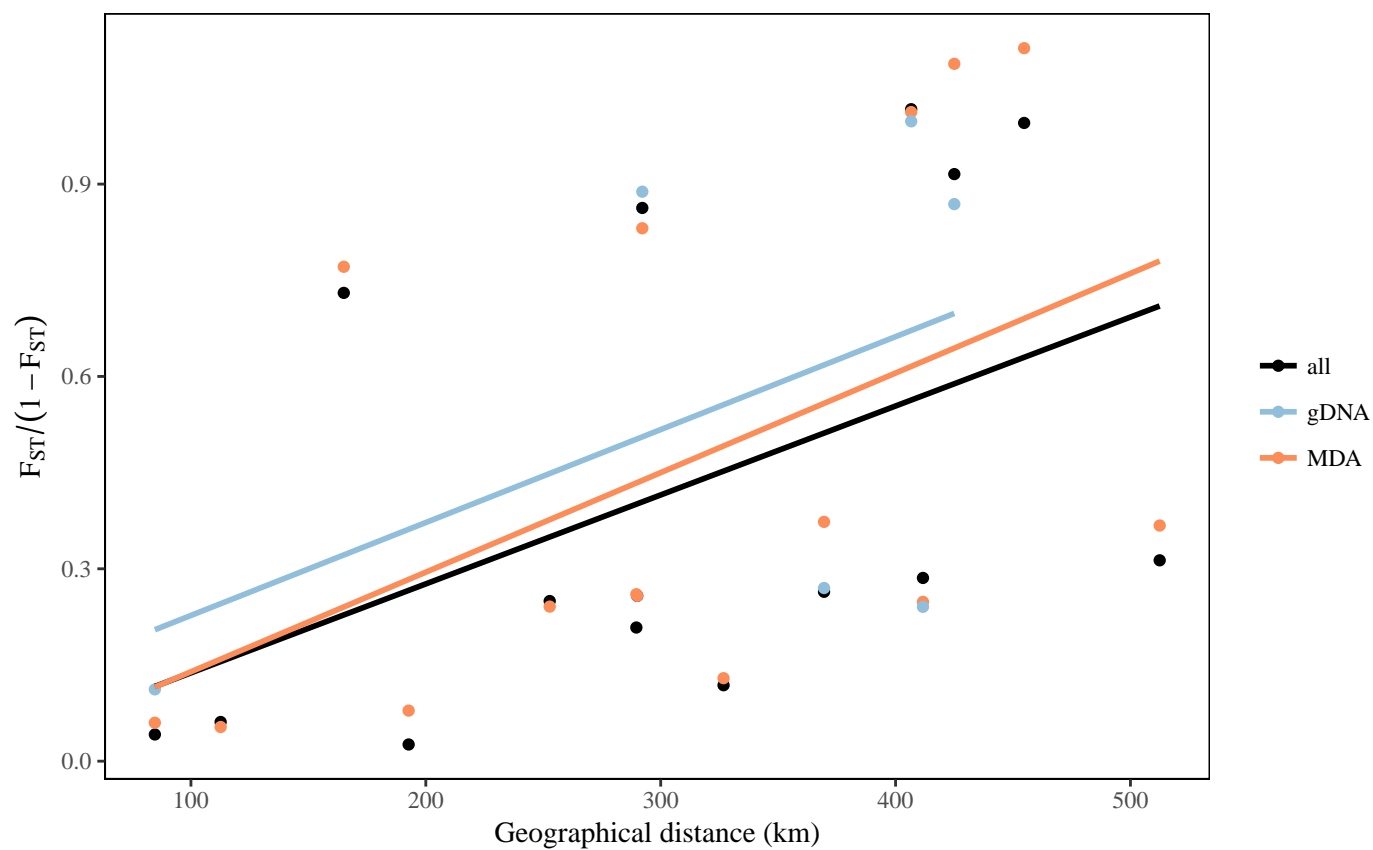

Supplement: Figure_S2_Mantel.pdf [file Figure_S2_Mantel.pdf]
